1 **Accumulation and purging of deleterious mutations through severe bottlenecks in ibex**

2

3 Christine Gossen<sup>1,\*</sup>, Frederic Guillaume<sup>1</sup>, Lukas F. Keller<sup>1,2,a,\*</sup>, Daniel Croll<sup>3,a,\*</sup>

4

5

6 <sup>1</sup>Department of Evolutionary Biology and Environmental Studies, University of Zurich, Zurich,

7 Switzerland

8 <sup>2</sup>Zoological Museum, University of Zurich, Karl-Schmid-Strasse 4, Zurich, Switzerland

9 <sup>3</sup>Laboratory of Evolutionary Genetics, Institute of Biology, University of Neuchâtel, Neuchâtel,

10 Switzerland

11

12 <sup>a</sup> LFK and DC contributed equally to this work

13 \* Authors for correspondence: [christine.gossen@ieu.uzh.ch](mailto:christine.gossen@ieu.uzh.ch), [lukas.keller@ieu.uzh.ch](mailto:lukas.keller@ieu.uzh.ch),

14 [daniel.croll@unine.ch](mailto:daniel.croll@unine.ch)

15

16

17 Author contributions:

18 Conception and design of study: CG, DC, LFK

19 Acquisition and analysis of data: CG

20 Interpretation of data: CG, DC, LFK, FG

21 Funding: CG, LFK

22 Wrote the manuscript with input from the other authors: CG, DC

23

## 24 **Abstract**

25 Population bottlenecks have a profound impact on the genetic makeup of a species including levels of  
26 deleterious variation. How reduced selection efficacy and purging interact is known from theory but  
27 largely lacks empirical support. Here, we analyze patterns of genome-wide variation in 60 genomes of  
28 six ibex species and the domestic goat. Ibex species that suffered recent severe bottlenecks accumulated  
29 deleterious mutations compared to other species. Then, we take advantage of exceptionally well-  
30 characterized repeated bottlenecks during the restoration of the near-extinct Alpine ibex and show that  
31 experienced bottleneck strength correlates with elevated individual inbreeding. Strong bottlenecks led  
32 to the accumulation of mildly deleterious mutations and purging of highly deleterious mutations. We  
33 show in a simulation model that realistic bottleneck strengths can indeed simultaneously purge highly  
34 deleterious mutations during overall mutation accumulation. Genome-wide purging of highly  
35 deleterious mutation load over few generations in the wild has implications for species conservation  
36 efforts.

37

38

## 39 **Main text**

40 Dramatic, temporary reductions in population size – so-called bottlenecks – occur in nearly all plant  
41 and animal populations including humans<sup>1</sup>. These demographic changes have important consequences  
42 for wildlife management and the conservation of endangered species<sup>2</sup>, but they also have profound  
43 consequences including genetic disorders<sup>e.g 3-7</sup>. Increased genetic drift and inbreeding due to bottlenecks  
44 lead to loss of neutral genetic variation, a reduced efficacy of natural selection, and increased expression  
45 of deleterious recessive mutations<sup>8-10</sup>. The expression of recessive mutations under inbreeding creates  
46 the potential for selection to act against these mutations, a process known as purging. Purging reduces  
47 the frequency of deleterious mutations depending on the population size, the degree of dominance, and  
48 the magnitude of the deleterious effects<sup>11</sup>. Unless population sizes are extremely low, bottlenecks tend  
49 to purge highly deleterious, recessive mutations<sup>11,12</sup>. On the other hand, genetic drift during bottlenecks  
50 reduces the efficacy of selection<sup>13</sup>. This allows mildly deleterious mutations to drift to substantially

51 higher frequencies<sup>6,14</sup>. The combination of purging and reduced selection efficacy generates complex  
52 dynamics of deleterious mutation frequencies following population bottlenecks<sup>11,12,15-17</sup>.  
53  
54 Theory predicts how reduced selection efficacy and purging impact the mutation load through  
55 bottlenecks<sup>11,15,16,18</sup>, but genetic evidence from wild populations is rare<sup>19-21</sup>. Most previous research  
56 used changes in fitness to infer possible purging events<sup>18,21-24</sup>, but changes in fitness can result from  
57 causes unrelated to purging such as adaptation to specific environmental conditions or the fixation of  
58 deleterious mutations<sup>10,25</sup>. One study provided direct evidence for purging of the most deleterious  
59 mutations in isolated mountain gorilla populations that split off larger lowland populations ~20'000  
60 years ago<sup>19</sup>. However, it remains unknown how more complex or recent demographic events affect  
61 levels of deleterious mutations in the wild. Here, we take advantage of exceptionally well characterized  
62 repeated bottlenecks during the reintroduction of the near-extinct Alpine ibex to retrace the fate of  
63 deleterious mutations. Alpine ibex were reduced to ~100 individuals in the 19th century in a single  
64 population in the Gran Paradiso region of Northern Italy<sup>26</sup>. In less than a century, a census size of ca.  
65 50'000 individuals has been re-established across the Alps. Thus, the population bottleneck of Alpine  
66 ibex is among the most dramatic recorded for any successfully restored species. Most extant populations  
67 experienced at least three bottlenecks leaving strong footprints of low genetic diversity<sup>27,28</sup>.  
68

Figure 1

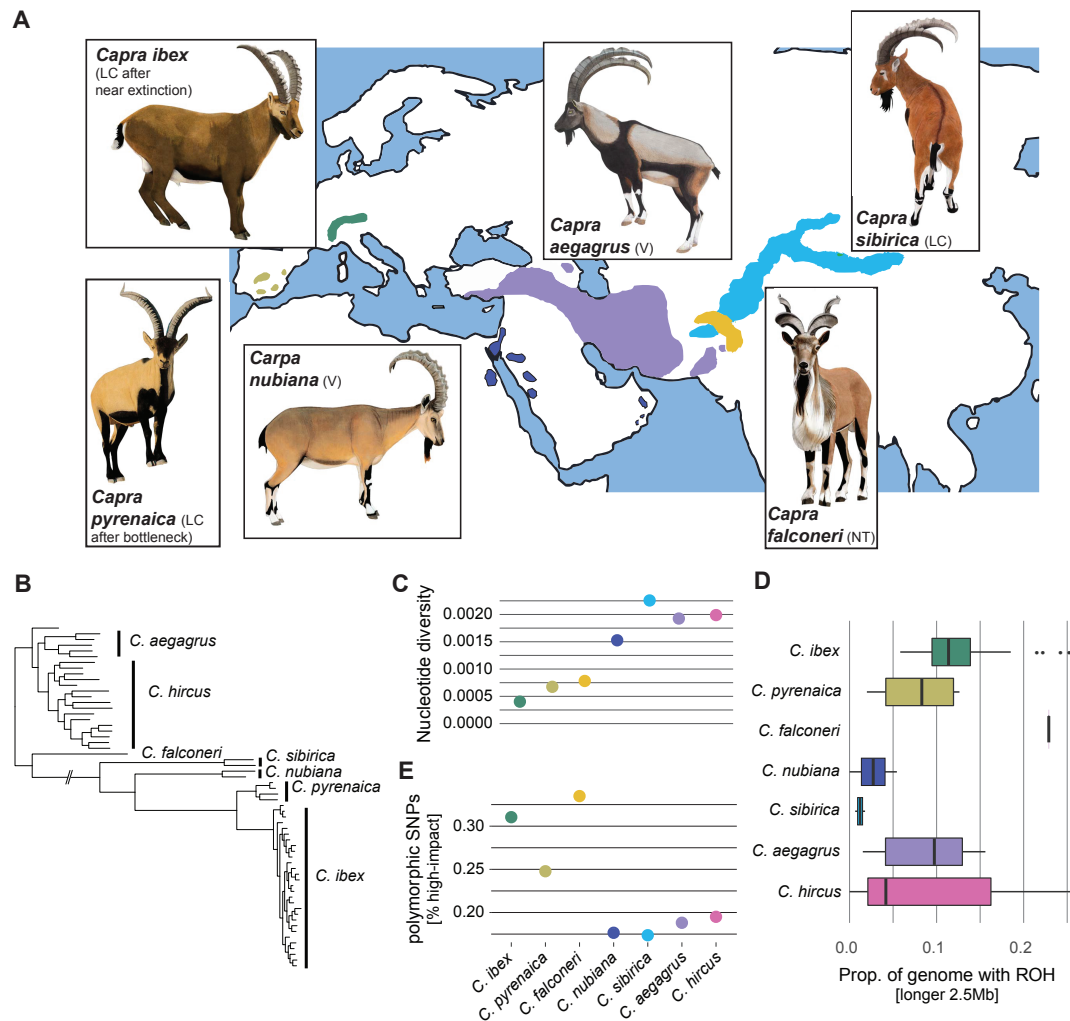

69

70 **Figure 1: Characterization of sampled ibex species.** A) Geographical distribution and IUCN conservation status  
 71 of ibex and wild goat species (LC: Least concern, V: Vulnerable, NT: Near threatened<sup>60</sup>). Sample sizes: *C. ibex*:  
 72 N=29, *C. pyrenaica*: N=4, *C. aegagrus*: N=6, *C. sibirica*: N=2, *C. falconeri*: N=1, *C. nubiana*: N=2. B) Maximum  
 73 likelihood phylogenetic analyses, C) nucleotide diversity, D) proportion of the genome with runs of homozygosity  
 74 (ROH) longer than 2.5 Mb and E) percentage of polymorphic sites within species that segregate highly deleterious  
 75 mutations.

76

77

78 We analyze 60 *Capra* genomes covering Alpine ibex (*C. ibex*), five additional wild goats and the  
 79 domestic goat, we find exceptionally low genome-wide variation and an accumulation of deleterious  
 80 mutations in Alpine ibex (Figure 1). Both nucleotide diversity and number of heterozygous sites per kb  
 81 sequenced was lowest in Alpine ibex and Iberian ibex (*C. pyrenaica*), the two species that experienced  
 82 the strongest recent bottlenecks (Figure 1C, Figure S2, Tables S1 and S2). Genome-wide diversity was  
 83 highest in Siberian ibex (*C. sibirica*), which have large and relatively well-connected populations<sup>29</sup>.

84 Genomes of the Siberian and Nubian ibex (*C. nubiana*) and of some domestic goat (*C. aegagrus hircus*)  
85 showed the least evidence for recent inbreeding estimated by genome-wide runs of homozygosity  
86 (ROH)<sup>30</sup>. In contrast, the genomes of some Alpine ibex, the Markhor (*C. falconeri*), and some domestic  
87 goat individuals contained more than 20% ROH (Figure 1D, Figures S3A and B, Table S3). Overall,  
88 there was clear genomic evidence that the near extinction and recovery of the Alpine ibex resulted in  
89 substantial genetic drift and inbreeding, opening the possibility for purging and accumulation of  
90 deleterious mutations.

91

92 We analyzed all *Capra* genomes for evidence of segregating deleterious mutations (Figure S6). We  
93 restricted our analyses to autosomal coding sequences with evidence for transcriptional activity in  
94 Alpine ibex organs. We further removed sites with low genomic evolutionary rate profiling (GERP)<sup>31</sup>  
95 scores yielding a total of 370'853 SNPs (Table S4). We functionally annotated SNP variants for the  
96 expected impact on the protein function. We found that across all seven *Capra* species 0.17% of these  
97 SNPs carried a highly deleterious variant with the majority incurring a stop-gain mutation (Table S4).  
98 We found that the proportion of highly deleterious mutations varied substantially among *Capra* species  
99 (Figure 1E, Figures S7A to D). The proportion of highly deleterious variants segregating within species  
100 was inversely correlated with nucleotide diversity (Pearson, df=5,  $r=-0.86$ ,  $p=0.012$ ). Hence, the *Capra*  
101 species with the smallest populations or the most severe population size reductions show an  
102 accumulation of deleterious mutations.

103

104 Both Alpine and Iberian ibex experienced severe bottlenecks due to overhunting and habitat  
105 fragmentation. Historic records indicate that Alpine ibex suffered a bottleneck of ~100 individuals at  
106 the end of the 19th century and Iberian ibex a bottleneck of ~1000 individuals<sup>32</sup> (Table S1). We first  
107 looked for evidence of purging in the allele frequency spectra of mutation classes of varying severity.  
108 We focused only on derived sites that were polymorphic in at least one of the two sister species (Figure  
109 2A, S8). We found that frequency distributions of high and moderate impact mutations in Alpine ibex  
110 were downwards shifted indicating purifying selection (Figure 2C and GERP score analyses in Figure  
111 S9A). Short indels ( $\leq 10$  bp) in coding sequences revealed a similar shift towards lower frequencies

112 (Figure S9B). This is consistent with stronger selection acting against highly deleterious mutations in  
 113 Alpine ibex.  
 114

Figure 2

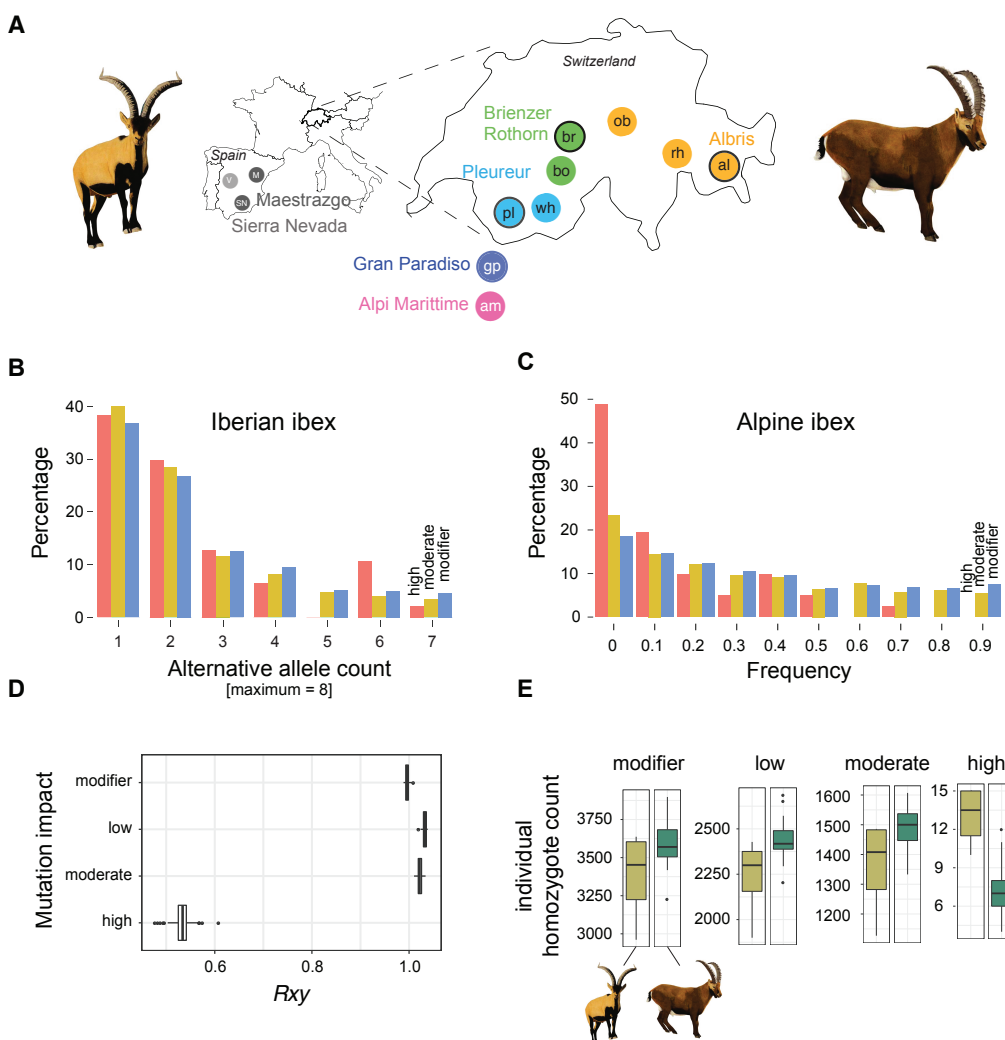

115  
 116 **Figure 2: Segregating deleterious mutations in Alpine and Iberian ibex.** A) Population sampling locations of  
 117 Iberian ibex (left, grey circles) and Alpine ibex (right, colored circles). Each filled circle represents a population.  
 118 Circles with a black outline indicate the first three reintroduced populations in Switzerland that were used for all  
 119 subsequent population reintroductions of Alpine ibex. Colors associate founder and descendant populations (see  
 120 also Figure 3A). Site frequency spectra for neutral (modifier), mildly (moderate impact) and highly deleterious  
 121 (high impact) mutations for (B) Iberian and (C) Alpine ibex. D)  $R_{xy}$  analysis contrasting Iberian with Alpine ibex  
 122 across the spectrum of impact categories.  $R_{xy} < 1$  indicates a relative frequency deficit of the corresponding  
 123 category in Alpine ibex compared to Iberian ibex. E) Individual homozygote counts per impact category for  
 124 Iberian (light green) and Alpine ibex (dark green).  
 125

126

127

128 To test whether Alpine ibex indeed showed evidence for purging of deleterious mutations compared to  
129 Iberian ibex, we calculated the relative number of derived alleles  $R_{xy}$ <sup>33</sup> for each mutation impact  
130 category (Figure 2D). We used a random set of intergenic SNPs for standardization, which makes  $R_{xy}$   
131 robust against sampling effects and population substructure<sup>33</sup>. Low and moderate impact mutations (*i.e.*  
132 mildly deleterious mutations) showed a minor excess in Alpine ibex compared to Iberian ibex,  
133 indicating a higher load in Alpine ibex. In contrast, we found that highly deleterious mutations were  
134 strongly reduced in Alpine ibex compared to Iberian ibex (Figure 2D). Strikingly, the proportion of  
135 SNPs across the genome segregating a highly deleterious mutation is higher in Alpine ibex (Figure 1E),  
136 but  $R_{xy}$  shows that highly deleterious mutations have a pronounced downwards allele frequency shift  
137 in Alpine ibex compared to Iberian ibex (Figure 2C). Furthermore, the number of homozygous sites  
138 with highly deleterious mutations per individual were considerably lower in Alpine ibex than Iberian  
139 ibex (Figure 2E). Together, this shows that highly deleterious mutations were substantially purged in  
140 Alpine ibex. We also found evidence for the accumulation of mildly deleterious mutations through  
141 genetic drift in Alpine ibex.

142  
143 Consistent with the fact that all extant Alpine ibex originate from the Gran Paradiso, this population  
144 occupies the center of a principal component analysis (Figure 3A-B, Figure S11A-B; <sup>28</sup>). The first  
145 populations re-established in the Alps were already clearly distinct from the Gran Paradiso source  
146 population and showed reduced nucleotide diversity (Figure 3A, C), having experienced 1 or 2  
147 additional bottlenecks<sup>27</sup>. These initial three reintroduced populations were used to establish additional  
148 populations, which underwent a total of 3-4 bottlenecks. These additional bottlenecks lead to further  
149 loss of nucleotide diversity and genetic drift, as indicated by the increasing spread in the principal  
150 component analysis (Figure 3A-C). An exceptional case constitutes the Alpi Marittime population,  
151 which was established through the translocation of 25 Gran Paradiso individuals of which only six  
152 successfully reproduced<sup>34</sup>. As expected from such an extreme bottleneck, Alpi Marittime showed  
153 strong genetic differentiation from all other Alpine ibex populations and highly reduced nucleotide  
154 diversity (Figures 3B-C; <sup>35</sup>). To estimate the expected strength of drift experienced by different  
155 populations, we estimated effective population sizes through the long-term harmonic mean population

156 sizes based on demographic records spanning the near century since establishment<sup>36,37</sup>. We found that  
 157 both the nucleotide diversity and the individual number of heterozygous sites per kb decreased with  
 158 smaller long-term population size (Figure 3C, Figure S12). In parallel to genetic drift, inbreeding was  
 159 also higher in the populations with the lowest harmonic mean population sizes. Genomes from the Gran  
 160 Paradiso source population generally showed the lowest proportions of the genome affected by ROH,  
 161 while reintroduced populations of lowest effective population size had the highest proportions of the  
 162 genome affected by ROH (Figure 3D and Figure S3).

Figure 3

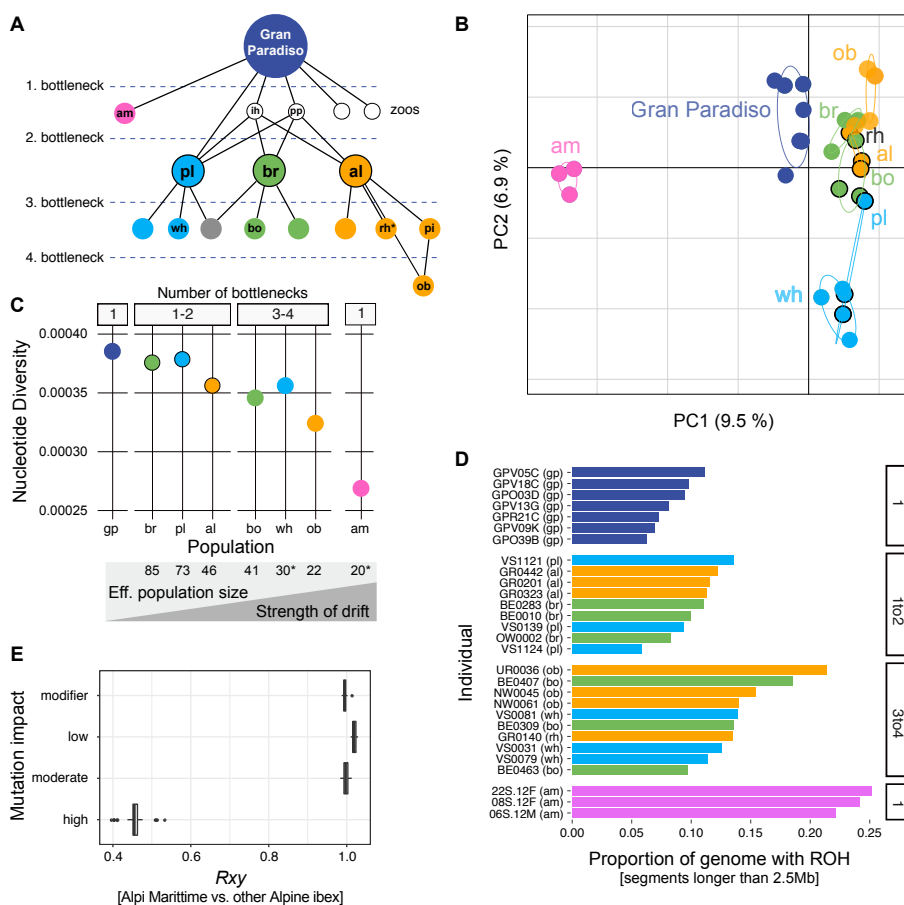

163

164 **Figure 3: Population genomic consequences of Alpine ibex recolonization.** A) Schematic showing the  
 165 recolonization history and population pedigree of Alpine ibex. Locations include also zoos and the population  
 166 Pilatus (pi), which was not sampled for this study but is known to have contributed to the population  
 167 Oberbauenstock (ob). am: Alpi Marittimo, gp: Gran Paradiso; ih: Zoo Interlaken Harder; al: Albris; bo: Bire  
 168 Öschinen; br: Briener Rothorn; ob: Oberbauenstock; pl: Pleureur; rh: Rheinwald; wh: Weisshorn; pi: Pilatus; pp:  
 169 Wildpark Peter and Paul. The grey circle represents a population that was founded from more than one population.  
 170 Figure elements were modified from Biebach and Keller (2009) with permission. B) Principal component analysis  
 171 of all Alpine ibex individuals included in the study. C) Nucleotide diversity per population. D) Proportion of the  
 172 genome within runs of homozygosity (ROH) longer than 2.5 Mb. E)  $R_{xy}$  analysis contrasting the strongly  
 173 bottlenecked Alpi Marittimo population with all other Alpine ibex populations across the spectrum of impact  
 174 categories.  $R_{xy} < 1$  indicates a relative frequency deficit of the corresponding category in the Alpi Marittimo  
 175 population. Circles with a black outline indicate the first three reintroduced populations in Switzerland that were



176 used for all subsequent population reintroductions of Alpine ibex. Colors associate founder and descendant  
177 populations.  
178

179

180 Bottlenecks should affect deleterious mutations by randomly increasing or decreasing allele frequencies  
181 at individual loci. As predicted from theory, we find that individuals from populations that underwent  
182 stronger bottlenecks carry significantly more homozygotes for modifier, low and moderate impact  
183 mutations (*i.e.* nearly neutral and mildly deleterious mutations; Figure 4A). In contrast, individuals  
184 showed no meaningful difference in number of homozygotes for high impact (*i.e.* highly deleterious)  
185 mutations across populations. The stability in the number of homozygotes for high impact mutations  
186 through successive bottlenecks despite a step-wise increase in the number of homozygotes for weaker  
187 impact mutations, strongly suggests that purging occurred over the course of the Alpine ibex  
188 reintroductions. This finding was confirmed using an alternative categorization of deleterious mutation  
189 load based on phylogenetic conservation based GERP scores (Figure S13). Because the above findings  
190 are contingent on a model where deleterious mutations are recessive, we also analyzed the total number  
191 of derived alleles per individual. We find a consistent but less pronounced increase in total number of  
192 derived alleles per individual for nearly neutral and mildly deleterious mutations (Figure 4B). In  
193 contrast, the total number of derived alleles for highly deleterious mutations did not correlate with the  
194 strength of bottleneck and was lowest in the most severely bottlenecked Alpi Marittime population  
195 (Figure 4B), suggesting that the most deleterious mutations were purged in this population. The  $R_{xy}$   
196 statistics showed a corresponding strong deficit in the Alpi Marittime population (Figure 3E). This is  
197 consistent with substantially more purging in the most bottlenecked Alpine ibex population.

198

Figure 4

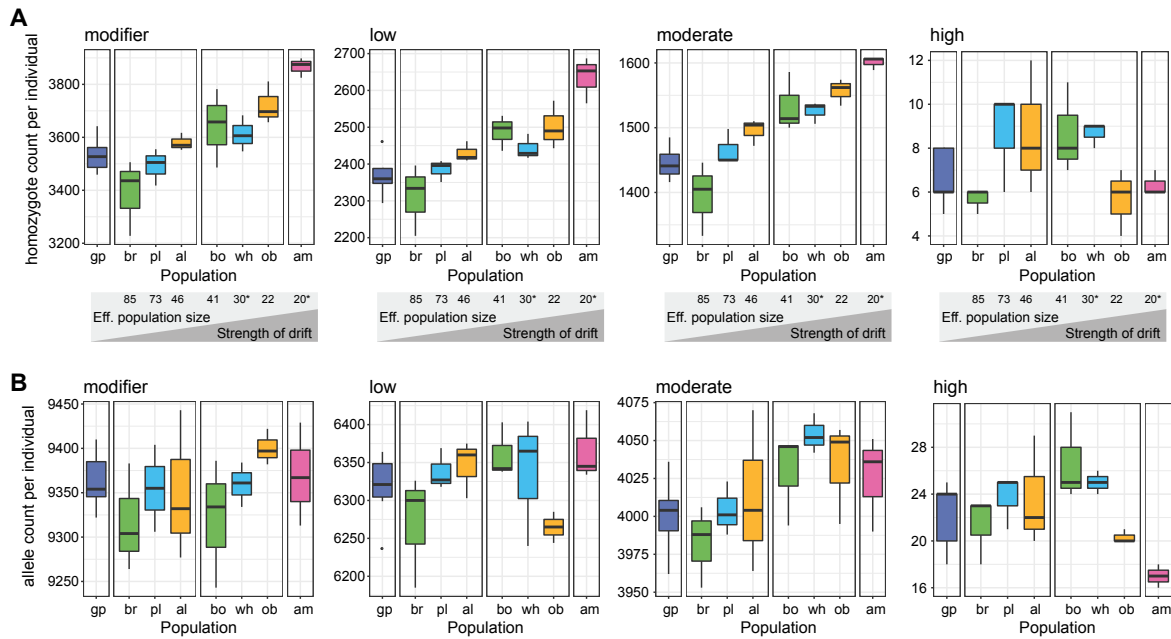

199

200 **Figure 4: Impact of recolonization on the mutation load per individual.** (A) Homozygote counts and (B) allele  
 201 counts per individual for each Alpine ibex population. The schematic between A and B indicates the harmonic  
 202 mean of the census size of each population, which is inversely correlated with the strength of drift. \*) Estimated  
 203 numbers. Colors associate founder and descendant populations (see also Figure 3A).  
 204

205

206 We analyzed the predicted protein truncation by highly deleterious mutations using homology-based  
 207 inferences. Focusing on high-impact mutations segregating in Alpine ibex, we found that nearly all  
 208 mutations disrupted conserved protein family (PFAM) domains encoded by the affected genes (Figure  
 209 5).

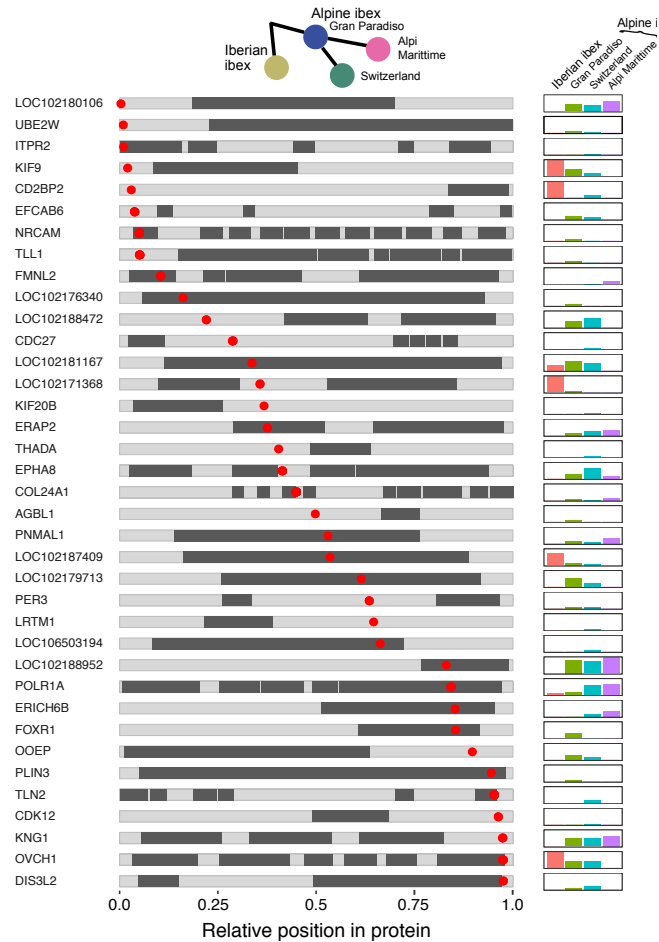

210

211 **Figure 5: Homology-based inference of the impact of highly deleterious mutations.** The localization of protein  
 212 family (PFAM) domains are highlighted in dark. Red dots indicate the relative position of a highly deleterious  
 213 mutation segregating in Alpine ibex. The frequencies of highly deleterious mutations are summarized for Iberian  
 214 ibex and three subsets of Alpine ibex. The demographic history is shown with a schematic.  
 215  
 216

217 To ascertain whether accumulation and purging of different mutation classes is indeed expected to occur  
 218 in the demographic context of the Alpine ibex reintroductions, we parametrized an individual-based  
 219 forward simulation model with the demographic record<sup>38</sup> (Figure 6A). The model included all  
 220 populations relevant for the founding of the populations under study and was parametrized with the  
 221 actual founder size (Figure 6A, S15, Table S1). We used *Rxy* to analyze the evolution of deleterious  
 222 mutation frequencies through the reintroduction bottlenecks. The simulations showed a deficit of highly  
 223 deleterious mutations after the reintroduction bottlenecks consistent with purging (Figure 6B). The most  
 224 bottlenecked Alpi Marittimo population also showed evidence of purging of the highly deleterious  
 225 mutations in the simulated dataset but simultaneously accumulation of mildly deleterious mutations

226 (Figures 6C, D). Consistent with evidence from  $R_{xy}$ , the simulations showed that the number of derived  
 227 mildly deleterious homozygotes increased with the strength of drift, while no increase was found for  
 228 highly deleterious mutations (Figure 6D, Figures S17-S20).

Figure 6

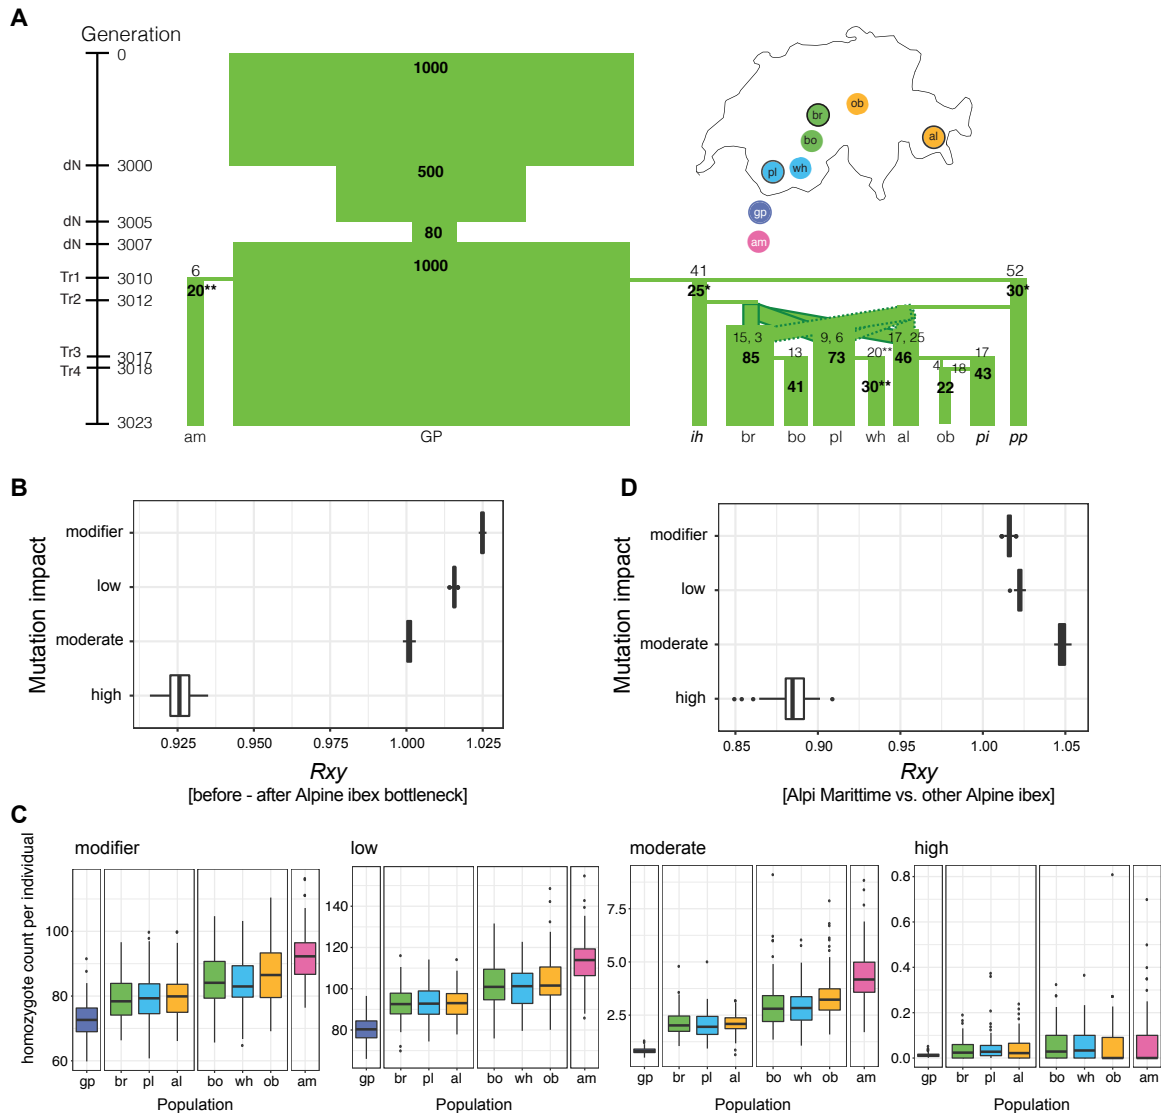

229

230 **Figure 6: Individual-based forward simulations recapitulating the reintroduction history of Alpine ibex.**  
 231 A) Demographic model used for the individual-based simulations. The model was parametrized using census data  
 232 and historical records (see methods). Bold numbers represent the carrying capacities defined as the harmonic  
 233 mean of the census size. Numbers not in bold represent the number of individuals released to found each  
 234 population. If a population was established from two source populations, the individual numbers are separated by  
 235 commas. \*) Upwards adjusted harmonic means of the census size (historical records were ih=16, Zoo Interlaken  
 236 Harder, and pp = 20, Wildpark Peter and Paul). The adjustment was necessary to prevent extinction of zoo  
 237 populations. \*\*) Census numbers were estimated based on historical records of the population but no long- term  
 238 data census data was available. B) Relative frequency comparison ( $R_{xy}$ ) of Alpine ibex just before and after the  
 239 species bottleneck and recolonization. C)  $R_{xy}$  analysis contrasting the strongly bottlenecked Alpi Marittimo  
 240 population with all other Alpine ibex populations across the spectrum of impact categories. D) Individual

241 homozygote counts per impact category. Boxplots summarized 100 population means across simulation  
242 replicates. Colors associate founder and descendant populations (see also Figure 3A).  
243  
244  
245 Ibex species with recently reduced population sizes accumulated deleterious mutations compared to  
246 closely related species. This accumulation was particularly pronounced in the Iberian ibex that  
247 experienced a severe bottleneck and Alpine ibex that went nearly extinct. We show that even though  
248 Alpine ibex carry an overall higher mutation burden than related species, the strong bottlenecks imposed  
249 by the reintroduction of populations purged highly deleterious mutations, the most bottlenecked  
250 population (Alpi Marittime) showing the most purging. However, purging was only effective against  
251 the most highly deleterious mutations. Empirical evidence for purging in the wild is scarce <sup>18,19</sup>. Here,  
252 we show that a few dozen generations were sufficient to reduce the burden of highly deleterious  
253 mutations. This suggests that purging may occur widely in populations undergoing severe bottlenecks.  
254 It is important to note that mildly deleterious mutations actually accumulated over the course of the  
255 reintroduction, consistent with less efficient selection against mildly deleterious mutations in small  
256 populations. Hence, the overall mutation load may have increased with bottleneck strength. This is  
257 consistent with the finding that population-level inbreeding, which is a strong indicator of past  
258 bottlenecks, is correlated with lower population growth rates in Alpine ibex (Bozzuto et al. *in review*).  
259 Our empirical results from the Alpine ibex reintroduction are in line with theoretical predictions that  
260 populations with an effective size below 100 individuals can accumulate a substantial burden of mildly  
261 deleterious mutations within a relatively short time. The burden of deleterious mutations evident in  
262 Iberian ibex supports the notion that even population sizes of ~1000 still accumulate mildly deleterious  
263 mutations. High loads of deleterious mutations have been shown to increase the extinction risk of a  
264 species <sup>39</sup>. Thus, conservation efforts aimed at keeping effective population sizes above a minimum of  
265 1000 individuals <sup>2</sup> are well justified.

266

267 **Methods**

268

269 *Genomic data acquisition*

270 DNA samples from 29 Alpine ibex, 4 Iberian ibex, 2 Nubian ibex, 2 Siberian ibex and 1 Markhor  
271 individuals were sequenced on an Illumina HiSeq2500 or HiSeq4000 to a depth of 15-38 (median of  
272 17). Table S2 specifies individual sampling locations. Libraries were produced using the TruSeq DNA  
273 Nano kit. Illumina sequencing data of 6 Bezoar and 16 domestic goat (coverage 6x – 14x, median 12x)  
274 were generated by the NextGen Consortium (<https://nextgen.epfl.ch>). The corresponding raw data was  
275 downloaded from the EBI Short Read Archive: <ftp://ftp.sra.ebi.ac.uk/vol1/fastq/>.

276

277 *Read alignment and variant calling*

278 Trimmomatic v.0.36<sup>40</sup> was used for quality and adapter trimming before reads were mapped to the  
279 domestic goat reference genome (version CHIR1,<sup>41</sup>) using Bowtie2 v.2.2.5<sup>42</sup>. MarkDuplicates from  
280 Picard (<http://broadinstitute.github.io/picard>, v.1.130) was used to mark duplicates. Genotype calling  
281 was performed using HaplotypeCaller and GenotypeGVCF (GATK, v.3.6<sup>43,44</sup>). VariantFiltration of  
282 GATK was used to remove single nucleotide polymorphisms (SNP) if: QD < 2.0, FS > 40.0, SOR > 5.0,  
283 MQ < 20.0, -3.0 > MQRankSum > 3.0, -3.0 > ReadPosRankSum > 3.0 and AN < 62 (80% of all Alpine  
284 ibex individuals). Indels up to 10 bp were also retained and filtered using the same filters and filter  
285 parameters, except for not including the filter MQRankSum, because this measure is more likely to be  
286 biased for indels of several base pairs. Filtering parameters were chosen based on genome-wide quality  
287 statistics distributions (see Figures S21 – S38). Variant positions were independently validated by using  
288 the SNP caller Freebayes (v1.0.2-33-gd6b6160<sup>45</sup>) with the following settings: --no-complex --use-best-  
289 n-alleles 6 --min-base-quality 3 --min-mapping-quality 20 --no-population-priors --hwe-priors-off.

290 To ensure high-quality SNPs, we only retained SNPs that were called and passed filtering using GATK,  
291 and that were confirmed by Freebayes. Overall, 97.5 % of all high-quality GATK SNP calls were  
292 confirmed by Freebayes. This percentage was slightly lower for chromosome X (96,7%) and unplaced  
293 scaffolds (95.2%). We tested whether the independent SNP calls of GATK and Freebayes were  
294 concordant and we could validate 99.6% of the biallelic SNPs. We retained genotypes called by GATK.

295 The total number of SNPs detected was 59.5 million among all species. Per species, the number of  
296 SNPs ranged from 21.9 million in the domestic goat (N=16) to 2.0 million in Markhor (N=1, Table S2).

297

### 298 *RNA-seq data generation*

299 Tissue samples of a freshly harvested Alpine ibex female were immediately conserved in *RNAlater*  
300 (QIAGEN) in the field and stored at -80°C until extraction. The following ten organs were sampled:  
301 retina/uvea, skin, heart, lung, lymph, bladder, ovary, kidney, liver and spleen. RNA was extracted using  
302 the AllPrep DNA/RNA Mini Kit from Qiagen following the manufacturer's protocol. Homogenization  
303 of the samples was performed using a Retsch bead beater (Retsch GmbH) in RLT plus buffer (Qiagen).  
304 RNA was enriched using a PolyA enrichment protocol implemented in the TruSeq RNA library  
305 preparation kit. Illumina sequencing libraries were produced using the Truseq RNA stranded kit.  
306 Sequencing was performed on two lanes of an Illumina Hiseq4000.

307

### 308 *Genetic diversity and runs of homozygosity*

309 Genetic diversity measured as individual number of heterozygous sites and nucleotide diversity were  
310 computed using vcfTools<sup>46</sup>. Runs of homozygosity were called using BCFtools/RoH<sup>47</sup>, an extension of  
311 the software package BCFtools, v.1.3.1. BCFtools/RoH uses a hidden Markov model to detect segments  
312 of autozygosity from next generation sequencing data. Due to the lack of a detailed linkage map, we  
313 used physical distance as a proxy for recombination rates with the option -M and assuming 1.2cM/Mb  
314 following sheep recombination rates<sup>48</sup>. Smaller values for -M led to slightly longer ROH (Figures S3  
315 –S5). Because of small per population sample size, we decided to fix the alternative allele frequency  
316 (option --AF-dflt) to 0.4. Estimates for the population with the largest sample size (Gran Paradiso, N=7)  
317 were very similar if actual population frequencies (option --AF-estimate sp) were used (Figures S4 and  
318 S5). Option --viterbi-training was used to estimate transition probabilities before running the HMM.  
319 Running the analysis without the option --viterbi-training led to less but longer ROH (Figures S3-S5).

320

### 321 *Identification of high-confidence deleterious mutations*

322 Three lines of evidence were used to identify high-confidence deleterious mutations. First, variants  
323 leading to a functional change are candidates for deleterious mutations. We used snpEff<sup>49</sup> v.4.3 for the  
324 functional annotation of each variant. The annotation file `ref_CHIR_1.0_top_level.gff3` was  
325 downloaded from: `ftp://ftp.ncbi.nlm.nih.gov/genomes/Capra_hircus/GFF` and then converted to `gtf`  
326 using `gffread`. Option `-V` was used to discard any mRNAs with CDS having in-frame stop codons.  
327 SnpEff predicts the effects of genetic variants (e.g. stop-gain variants) and assesses the expected impact.  
328 The following categories were retrieved: high (e.g. stop-gain or frameshift variant), moderate (e.g.  
329 missense variant, in-frame deletion), low (e.g. synonymous variant) and modifier (e.g. exon variant,  
330 downstream gene variant). In the case of overlapping transcripts for the same variant, we used the  
331 primary transcript for further analysis. A total of 49.0 % of all detected SNPs were located in intergenic  
332 regions, 43.2 % in introns, 6.5 % down- and upstream of genes. A total of 0.7% of variants were within  
333 CDS, of which ~60% were synonymous and ~40% were missense variants. Overall, 0.002 % were stop-  
334 gain mutations.

335 Protein sequences were annotated using InterProScan v.5.33 by identifying conserved protein family  
336 (PFAM) domains<sup>50</sup>.

337

338 Second, we assessed the severity of a variant by its phylogenetic conservation score. A non-  
339 synonymous variant is more likely to be deleterious if it occurs in a conserved region of the genome.  
340 We used GERP conservation scores, which are calculated as the number of substitutions observed  
341 minus the number of substitutions expected from the species tree under a neutral model. We  
342 downloaded GERP scores (accessed from `http://mendel.stanford.edu/SidowLab`), which have been  
343 computed for the human reference genome version hg19. The alignment was based on 35 mammal  
344 species but did not include the domestic goat (see `https://genome.ucsc.edu/cgi-  
345 bin/hgTrackUi?db=hg19&g=allHg19RS_BW` for more information). Exclusion of the focal species  
346 domestic goat is recommended for the computation of conservation scores, as the inclusion of the  
347 reference genome may lead to biases<sup>51</sup>.



348 In order to remap the GERP scores associated to hg19 positions to the domestic goat reference genome  
349 positions, we used liftOver ([hgdownload.cse.ucsc.edu](http://hgdownload.cse.ucsc.edu), v.287) and the chain file downloaded from  
350 [hgdownload-test.cse.ucsc.edu/goldenPath/capHir1](http://hgdownload-test.cse.ucsc.edu/goldenPath/capHir1).

351

352 Third, we ascertained support for gene models annotated in the domestic goat genome with expression  
353 analyses of Alpine ibex tissue samples. We included expression data from 10 organs of an Alpine ibex  
354 female (see RNA-seq data section above) to assess expression levels of each gene model. Quality  
355 filtering of the raw data was performed using Trimmomatic<sup>40</sup> v.0.36. Hisat2<sup>52</sup> v.2.0.5 was used to map  
356 the reads of each organ to the domestic goat reference genome. The mapping was run with option --  
357 rna-strandness RF (stranded library) and supported by including a file with known splice sites (option  
358 --known-splicesite-infile). The input file was produced using the script `hisat2_extract_splice_sites.py`  
359 (part of hisat2 package) from the same gtf file as the one used for the snpEff analysis (see above). For  
360 each organ, featureCounts<sup>53</sup> (subread-1.5.1) was used to count reads per each exon using the following  
361 options: -s 2 (reverse stranded) -f (count reads at the exon level), -O (assign reads to all their  
362 overlapping features), -C (excluding read pairs mapping to different chromosomes or the same  
363 chromosome but on a different strand). The R package edgeR<sup>54</sup> was used to calculate FPKM  
364 (Fragments Per Kilobase Of Exon Per Million Fragments Mapped) per each gene and organ. For variant  
365 sites that were included in more than one exon, the highest FPKM value was used. We found that 16'013  
366 out of 17'998 genes showed transcriptional activity of at least one exon (FPKM > 0.3). Overall 166'973  
367 out of 178'504 exons showed evidence for transcription. In a total of 1928 genes, one or more exons  
368 showed no evidence for transcription. Retained SNPs were found among 118'756 exons and 17'685  
369 genes. Overall 611'711 out of 677'578 SNPs were located in genes with evidence for transcription.

370

371 Deleterious mutations are assumed to be overwhelmingly derived mutations. We used all ibex species  
372 except Alpine and Iberian ibex as an outgroup to define the derived state. For each biallelic site, which  
373 was observed in alternative state in Alpine ibex or Iberian ibex, the alternative state was defined as  
374 derived if its frequency was zero in all other species (a total of 44'730 autosomal SNPs). For loci with  
375 more than two alleles, the derived state was defined as unknown. For comparisons among all species,

376 we only used the following criteria to select SNPs (370'853 biallelic SNPs retained): transcriptional  
377 activity (FPKM > 0.3 in at least one organ), GERP > -2 and a minimal distance to the next SNP of 3bp.  
378

### 379 *Individual-based simulations with Nemo*

380 Individual-based forward simulations were run using the software Nemo<sup>38</sup> v.2.3.51. A customized  
381 version of aNEMOne<sup>55</sup> was used to prepare input files for parameter exploration. The sim.ini file for  
382 the final set of parameters run in 100 replicates is available as Supplementary File 1. All populations  
383 relevant for the founding of the populations under study were included in the model. See Figure 6A for  
384 the simulated demography, which was modeled with the actual founder numbers (assuming a sex-ratio  
385 of 1:1), while the translocations were simplified into four phases (data from<sup>37</sup>, DRYAD entry  
386 doi:10.5061/dryad.274b1 and<sup>36</sup>). The harmonic mean of the population census from the founding up to  
387 the final sampling year (2007) was used to define the population carrying capacity. Mating was assumed  
388 to be random and fecundity (mean number of offspring per female) set to five. The selection coefficients  
389 of 5000 biallelic loci subject to selection were drawn from a gamma distribution with a mean of 0.01  
390 and a shape parameter of 0.3 resulting in  $s < 1\%$  for 99.2% of all loci<sup>56</sup> (Figure S16). Based on empirical  
391 evidence, we assumed a negative relationship between  $h$  and  $s$ <sup>57</sup>. We used the exponential equation  $h$   
392  $= \exp(-51*s)/2$  with a mean  $h$  set to 0.37 following<sup>58</sup>. We assumed hard selection acting at the offspring  
393 level. In addition to the 5000 loci under selection, we simulated 500 neutral loci. Recombination rates  
394 among each neutral or deleterious locus was set to 0.5. This corresponds to an unlinked state. Initial  
395 allele frequencies were set to  $\mu / h * s = 0.0014$  (corresponding to the expected mean frequency at  
396 mutation-selection balance<sup>59</sup>). Mutation rate  $\mu$  was set to 5e-05 and deleterious mutations were allowed  
397 to back-mutate at a rate of 5e-07.

398 A burn-in of 3000 generations was run with one population ( $N = 1000$ ) representing the entire species  
399 allowing to reach a quasi-equilibrium.  $N$  was reduced to  $N = 500$  for five generations before a brief,  
400 two generation bottleneck of  $N = 80$ . At generation 3007, the population recovered to  $N = 1000$  and  
401 three generations later the reintroduction was started with the founding of the two zoos Interlaken  
402 Harder (ih) and Peter and Paul (pp). The founding of new populations was modeled by migration of

403 offspring into an empty patch.

404 The zoo ih (Interlaken Harder) and several populations did not survive all replicates of the simulations.  
405 Extinction rates were as follows: ih (Zoo Interlaken Harder) 84%, bo (Bire Öschinen) 3%, wh  
406 (Weisshorn) 3%, ob (Oberbauenstock) 9%, am (Alpi Marittime) 14% and pil (Pilatus) 2%. The high  
407 extinction rate of the zoo Interlaken Harder did not affect the outcome of the simulations. The  
408 extinctions were a result of the strong reduction in population size during the founding and occurred  
409 always after the founding (see also Figure S15). The extinctions of the reintroduced populations did not  
410 affect the estimates of derived allele counts but reduced sample sizes and, hence, affected the variance  
411 of estimators.

#### 412 *Data availability*

413 Raw whole-genome sequencing data produced for this project was deposited at the NCBI Short Read  
414 Archive under the Accession nos. SAMN10736122–SAMN10736160 (BioProject PRJNA514886).  
415 Raw RNA sequencing data produced for this project was deposited at the NCBI Short Read Archive  
416 under the Accession nos. SAMN10839218-SAMN10839227 (BioProject PRJNA517635).

417

#### 418 **Acknowledgments**

419 We thank the following organizations and colleagues who contributed samples to this project. Iris  
420 Biebach, the Swiss hunting authorities of the cantons of Bern, Nidwalden, Obwalden, Uri, Graubünden  
421 and Wallis; the Gran Paradiso National Park (Alice Brambilla) and the Alpi Marittime National Park  
422 (Laura Martinelli), Sebastien Regnaut and Richard Kock, Zoological Society of London, Christian  
423 Siegenthaler, Ruedi Kunz and Samer Angelone-Alasaad. We are thankful to Glauco Camenisch and  
424 Kasia Sluzek, who provided access to Alpine ibex RNAseq datasets. We thank Laurent Excoffier,  
425 Stephan Peischl, Kimberly Gilbert, Heidi Lischer, Stefan Wyder, Thomas Wicker, Alan Brelsford and  
426 Jessica Purcell for helpful advice and comments on a previous version of the manuscript. We are  
427 grateful for drawings by Nadine Coline of the Zoological Museum of Zürich. This work was supported  
428 by the University of Zurich through a University Research Priority Program "Evolution in Action" pilot  
429 project grant and the Swiss Federal Office for the Environment. DC and CG were supported by the

430 Swiss National Science Foundation (grant 31003A\_173265 and 31003A\_182343, respectively). This  
431 study makes use of data generated by the NextGen Consortium, which was supported by grant  
432 agreement number 244356 of the European Union's Seventh Framework Programme (FP7/2010-2014).  
433

434 **References:**

- 435 1. Morton, N. E., Crow, J. F. & Muller, H. J. An estimate of the mutational damage in man  
436 from data on consanguineous marriages. *PNAS* **42**, 855–863 (1956).
- 437 2. Frankham, R., Bradshaw, C. J. A. & Brook, B. W. Genetics in conservation management:  
438 Revised recommendations for the 50/500 rules, Red List criteria and population viability  
439 analyses. *Biol Conserv* **170**, 56–63 (2014).
- 440 3. Cruz, F., Vilà, C. & Webster, M. T. The legacy of domestication: accumulation of  
441 deleterious mutations in the dog genome. *Mol Biol Evol* **25**, 2331–2336 (2008).
- 442 4. Renaut, S. & Rieseberg, L. H. The accumulation of deleterious mutations as a consequence  
443 of domestication and improvement in sunflowers and other *compositae* crops. *Mol Biol Evol*  
444 **32**, 2273–2283 (2015).
- 445 5. Lynch, M. Mutation and human exceptionalism: our future genetic load. *Genetics* **202**, 869–  
446 875 (2016).
- 447 6. Marsden, C. D. *et al.* Bottlenecks and selective sweeps during domestication have increased  
448 deleterious genetic variation in dogs. *PNAS* **113**, 152–157 (2016).
- 449 7. Laenen, B. *et al.* Demography and mating system shape the genome-wide impact of  
450 purifying selection in *Arabis alpina*. *PNAS* **115**, 816–821 (2018).
- 451 8. Charlesworth, B. Effective population size and patterns of molecular evolution and variation.  
452 *Nat Rev Genet* **10**, 195–205 (2009).
- 453 9. Kimura, M. Stochastic processes and distribution of gene frequencies under natural  
454 selection. *Cold Spring Harb. Symp. Quant. Biol.* **20**, 33–53 (1955).
- 455 10. Keller, L. & Waller, D. Inbreeding effects in wild populations. *Trends Ecol Evol* **17**, 230–  
456 241 (2002).
- 457 11. Glémin, S. How are deleterious mutations purged? Drift versus nonrandom mating.  
458 *Evolution* **57**, 2678–2687 (2003).
- 459 12. Garcia-Dorado, A. Understanding and predicting the fitness decline of shrunk populations:  
460 inbreeding, purging, mutation, and standard selection. *Genetics* **190**, 1461–1476 (2012).
- 461 13. Crow, J. F. Genetic loads and the cost of natural selection. in *Mathematical Topics in*  
462 *Population Genetics* (ed. Kojima, K. I.) 128–177 (Springer-Verlag, 1970).
- 463 14. Robinson, J. A. *et al.* Genomic flatlining in the endangered island fox. *Curr Biol* **26**, 1183–  
464 1189 (2016).
- 465 15. Kirkpatrick, M. & Jarne, P. The effects of a bottleneck on inbreeding depression and the  
466 genetic load. *Am Nat* **155**, 154–167 (2000).
- 467 16. Bataillon, T. & Kirkpatrick, M. Inbreeding depression due to mildly deleterious mutations in  
468 finite populations: size does matter. *Genet Res* **75**, 75–81 (2000).
- 469 17. Willi, Y., Fracassetti, M., Zoller, S. & Van Buskirk, J. Accumulation of mutational load at  
470 the edges of a species range. *Mol Biol Evol* **22**, 140 (2018).
- 471 18. Hedrick, P. W. & Garcia-Dorado, A. Understanding inbreeding depression, purging, and  
472 genetic rescue. *Trends Ecol Evol* **31**, 940–952 (2016).
- 473 19. Xue, Y. Mountain gorilla genomes reveal the impact of long-term population decline and  
474 inbreeding. *Science* **348**, 239–242 (2015).
- 475 20. Rogers, R. L. & Slatkin, M. Excess of genomic defects in a woolly mammoth on Wrangel  
476 island. *PLoS Genet* **13**, e1006601 (2017).
- 477 21. Robinson, J. A., Brown, C., Kim, B. Y., Lohmueller, K. E. & Wayne, R. K. Purging of  
478 strongly deleterious mutations explains long-term persistence and absence of inbreeding  
479 depression in island foxes. *Curr Biol* 1–13 (2018). doi:10.1016/j.cub.2018.08.066
- 480 22. Laws, R. J. & Jamieson, I. G. Is lack of evidence of inbreeding depression in a threatened  
481 New Zealand robin indicative of reduced genetic load? *Animal Conservation* **14**, 47–55  
482 (2011).
- 483 23. Kennedy, E. S., Grueber, C. E., Duncan, R. P. & Jamieson, I. G. Severe inbreeding  
484 depression and no evidence of purging in an extremely inbred wild species--the Chatham  
485 Island black robin. *Evolution* **68**, 987–995 (2014).
- 486 24. Crnokrak, P. & Barrett, S. Perspective: Purging the genetic load: A review of the  
487 experimental evidence. *Evolution* **56**, 2347–2358 (2002).

- 488 25. Kalinowski, S. T., Hedrick, P. W. & Miller, P. S. Inbreeding depression in the Speke's  
489 gazelle captive breeding program. *Conserv Biol* **14**, 1375–1384 (2000).
- 490 26. Grodinsky, C. & Stuwe, M. The reintroduction of the Alpine ibex to the Swiss Alps.  
491 *Smithsonian* **18**, 68–77 (1987).
- 492 27. Biebach, I. & Keller, L. F. A strong genetic footprint of the re-introduction history of Alpine  
493 ibex (*Capra ibex ibex*). *Mol Ecol* **18**, 5046–5058 (2009).
- 494 28. Grossen, C., Biebach, I., Angelone-Alasaad, S., Keller, L. F. & Croll, D. Population  
495 genomics analyses of European ibex species show lower diversity and higher inbreeding in  
496 reintroduced populations. *Evol Appl* **11**, 123–139 (2018).
- 497 29. Reading, R. & Shank, C. *Capra sibirica*: The IUCN Red List of Threatened Species 2008.  
498 doi:10.2305/IUCN.UK.2008.RLTS.T42398A10695735.en
- 499 30. McQuillan, R. *et al.* Runs of homozygosity in European populations. *The American Journal*  
500 *of Human Genetics* **83**, 359–372 (2008).
- 501 31. Cooper, G. M. *et al.* Distribution and intensity of constraint in mammalian genomic  
502 sequence. *Genome Res* **15**, 901–913 (2005).
- 503 32. Couturier, M. *Le Bouquetin des Alpes*. (1962).
- 504 33. Do, R. *et al.* No evidence that selection has been less effective at removing deleterious  
505 mutations in Europeans than in Africans. *Nature* **47**, 126–131 (2015).
- 506 34. Terrier, G. & Rossi, P. Le bouquetin (*Capra ibex ibex*) dans les alpes maritimes franco-  
507 italiennes: occupation de l'espace, clonisation et régulation naturelles. *Travaux Scientifiques*  
508 *du Parc National de la Vanoise XVIII*, 271–288 (1994).
- 509 35. Maudet, C. *et al.* Microsatellite DNA and recent statistical methods in wildlife conservation  
510 management: applications in Alpine ibex *Capra ibex (ibex)*. *Mol Ecol* **11**, 421–436 (2002).
- 511 36. Biebach, I. & Keller, L. F. Inbreeding in reintroduced populations: the effects of early  
512 reintroduction history and contemporary processes. *Conserv Genet* **11**, 527–538 (2010).
- 513 37. Aeschbacher, S., Futschik, A. & Beaumont, M. A. Approximate Bayesian computation for  
514 modular inference problems with many parameters: the example of migration rates. *Mol Ecol*  
515 **22**, 987–1002 (2013).
- 516 38. Guillaume, F. & Rougemont, J. Nemo: an evolutionary and population genetics  
517 programming framework. *Bioinformatics* **22**, 2556–2557 (2006).
- 518 39. Lynch, M., Conery, J. & Burger, R. Mutation accumulation and the extinction of small  
519 populations. *Am Nat* **146**, 489–518 (1995).
- 520 40. Bolger, A. M., Lohse, M. & Usadel, B. Trimmomatic: a flexible trimmer for Illumina  
521 sequence data. *Bioinformatics* **30**, 2114–2120 (2014).
- 522 41. Dong, Y. *et al.* Sequencing and automated whole-genome optical mapping of the genome of  
523 a domestic goat (*Capra hircus*). *Nat Biotechnol* **31**, 135–141 (2012).
- 524 42. Langmead, B. & Salzberg, S. L. Fast gapped-read alignment with Bowtie 2. *Nature Methods*  
525 **9**, 357–359 (2012).
- 526 43. McKenna, A. *et al.* The Genome Analysis Toolkit: a MapReduce framework for analyzing  
527 next-generation DNA sequencing data. *Genome Res* **20**, 1297–1303 (2010).
- 528 44. DePristo, M. A. *et al.* A framework for variation discovery and genotyping using next-  
529 generation DNA sequencing data. *Nat Genet* **43**, 491–498 (2011).
- 530 45. Garrison, E. FreeBayes source repository. Available at: <https://github.com/ekg/freebayes>.  
531 (Accessed: 14 November 2018)
- 532 46. Danecek, P. *et al.* The variant call format and VCFtools. *Bioinformatics* **27**, 2156–2158  
533 (2011).
- 534 47. Narasimhan, V. *et al.* BCFtools/RoH: a hidden Markov model approach for detecting  
535 autozygosity from next-generation sequencing data. *Bioinformatics* **32**, 1749–1751 (2016).
- 536 48. Dumont, B. L. Payseur, Bret A. Evolution of the genomic rate of recombination in mammals.  
537 *Evolution* **62**, 276–294 (2008).
- 538 49. Cingolani, P. *et al.* A program for annotating and predicting the effects of single nucleotide  
539 polymorphisms, SnpEff: SNPs in the genome of *Drosophila melanogaster* strain w(1118);  
540 iso-2; iso-3. *fly* **6**, 80–92 (2012).
- 541 50. Jones, P. *et al.* InterProScan 5: genome-scale protein function classification. *Bioinformatics*  
542 **30**, 1236–1240 (2014).

- 543 51. Fu, W., Gittelman, R. M., Bamshad, M. J. & Akey, J. M. Characteristics of neutral and  
544 deleterious protein-coding variation among individuals and populations. *Am J Hum Genet* **95**,  
545 421–436 (2014).
- 546 52. Kim, D., Langmead, B. & Salzberg, S. L. HISAT: a fast spliced aligner with low memory  
547 requirements. *Nature Methods* **12**, 357–360 (2015).
- 548 53. Liao, Y., Smyth, G. K. & Shi, W. featureCounts: an efficient general purpose program for  
549 assigning sequence reads to genomic features. *Bioinformatics* **30**, 923–930 (2014).
- 550 54. Robinson, M. D., McCarthy, D. J., Bioinformatics, G. S. 2010. edgeR: a Bioconductor  
551 package for differential expression analysis of digital gene expression data.  
552 *academic.oup.com*
- 553 55. kjgilbert/aNEMOne. (2017).
- 554 56. Keightley, P. D. The distribution of mutation effects on viability in *Drosophila melanogaster*.  
555 *Genetics* **138**, 1315–1322 (1994).
- 556 57. Agrawal, A. F. & Whitlock, M. C. Inferences about the distribution of dominance drawn  
557 from yeast gene knockout data. *Genetics* **187**, 553–566 (2011).
- 558 58. Gilbert, K. J. *et al.* Local Adaptation Interacts with Expansion Load during Range  
559 Expansion: Maladaptation Reduces Expansion Load. *Am Nat* **189**, 368–380 (2017).
- 560 59. Crow, J. F. & Kimura, M. *An Introduction to Population Genetics Theory*. (New Jersey:  
561 Blackburn Press, 1970).
- 562 60. IUCN 2018. <http://www.iucnredlist.org> Available at: (Accessed: 10 November 2018)
- 563

564

565

566

## 567 **Figure legends**

568

569 **Figure 1: Characterization of sampled ibex species.** A) Geographical distribution and IUCN  
570 conservation status of ibex and wild goat species (LC: Least concern, V: Vulnerable, NT: Near  
571 threatened<sup>60</sup>). Sample sizes: *C. ibex*: N=29, *C. pyrenaica*: N=4, *C. aegagrus*: N=6, *C. sibirica*: N=2, *C.*  
572 *falconeri*: N=1, *C. nubiana*: N=2. B) Maximum likelihood phylogenetic analyses, C) nucleotide  
573 diversity, D) proportion of the genome with runs of homozygosity (ROH) longer than 2.5 Mb and E)  
574 percentage of polymorphic sites within species that segregate highly deleterious mutations.

575

576 **Figure 2: Segregating deleterious mutations in Alpine and Iberian ibex.** A) Population sampling  
577 locations of Iberian ibex (left, grey circles) and Alpine ibex (right, colored circles). Each filled circle  
578 represents a population. Circles with a black outline indicate the first three reintroduced populations in  
579 Switzerland that were used for all subsequent population reintroductions of Alpine ibex. Colors  
580 associate founder and descendant populations (see also Figure 3A). Site frequency spectra for neutral  
581 (modifier), mildly (moderate impact) and highly deleterious (high impact) mutations for (B) Iberian

582 and (C) Alpine ibex. D)  $R_{xy}$  analysis contrasting Iberian with Alpine ibex across the spectrum of impact  
583 categories.  $R_{xy} < 1$  indicates a relative frequency deficit of the corresponding category in Alpine ibex  
584 compared to Iberian ibex. E) Individual homozygote counts per impact category for Iberian (light green)  
585 and Alpine ibex (dark green).

586

587 **Figure 3: Population genomic consequences of Alpine ibex recolonization.** A) Schematic showing  
588 the recolonization history and population pedigree of Alpine ibex. Locations include also zoos and the  
589 population Pilatus (pi), which was not sampled for this study but is known to have contributed to the  
590 population Oberbauenstock (ob). am: Alpi Marittime, gp: Gran Paradiso; ih: Zoo Interlaken Harder; al:  
591 Albris; bo: Bire Öschinen; br: Brienzer Rothorn; ob: Oberbauenstock; pl: Pleureur; rh: Rheinwald; wh:  
592 Weisshorn; pi: Pilatus; pp: Wildpark Peter and Paul. The grey circle represents a population that was  
593 founded from more than one population. Figure elements were modified from Biebach and Keller  
594 (2009) with permission. B) Principal component analysis of all Alpine ibex individuals included in the  
595 study. C) Nucleotide diversity per population. D) Proportion of the genome within runs of  
596 homozygosity (ROH) longer than 2.5 Mb. E)  $R_{xy}$  analysis contrasting the strongly bottlenecked Alpi  
597 Marittime population with all other Alpine ibex populations across the spectrum of impact categories.  
598  $R_{xy} < 1$  indicates a relative frequency deficit of the corresponding category in the Alpi Marittime  
599 population. Circles with a black outline indicate the first three reintroduced populations in Switzerland  
600 that were used for all subsequent population reintroductions of Alpine ibex. Colors associate founder  
601 and descendant populations.

602

603 **Figure 4: Impact of recolonization on the mutation load per individual.** (A) Homozygote counts  
604 and (B) allele counts per individual for each Alpine ibex population. The schematic between A and B  
605 indicates the harmonic mean of the census size of each population, which is inversely correlated with  
606 the strength of drift. \*) Estimated numbers. Colors associate founder and descendant populations (see  
607 also Figure 3A).

608



609 **Figure 5: Homology-based inference of the impact of highly deleterious mutations.** The  
610 localization of protein family (PFAM) domains are highlighted in dark. Red dots indicate the relative  
611 position of a highly deleterious mutation segregating in Alpine ibex. The frequencies of highly  
612 deleterious mutations are summarized for Iberian ibex and three subsets of Alpine ibex. The  
613 demographic history is shown with a schematic.

614

615 **Figure 6: Individual-based forward simulations recapitulating the reintroduction history of**  
616 **Alpine ibex.** A) Demographic model used for the individual-based simulations. The model was  
617 parametrized using census data and historical records (see methods). Bold numbers represent the  
618 carrying capacities defined as the harmonic mean of the census size. Numbers not in bold represent  
619 the number of individuals released to found each population. If a population was established from two  
620 source populations, the individual numbers are separated by commas. \* ) Upwards adjusted harmonic  
621 means of the census size (historical records were  $ih = 16$  and  $pp = 20$ ). The adjustment was necessary  
622 to prevent extinction of zoo populations. \*\*) Census numbers were estimated based on historical  
623 records of the population but no long- term data census data was available. B) Relative frequency  
624 comparison ( $R_{xy}$ ) of Alpine ibex just before and after the species bottleneck and recolonization. C)  
625  $R_{xy}$  analysis contrasting the strongly bottlenecked Alpi Marittime population with all other Alpine  
626 ibex populations across the spectrum of impact categories. D) Individual homozygote counts per  
627 impact category. Boxplots summarized 100 population means across simulation replicates. Colors  
628 associate founder and descendant populations (see also Figure 3A).

Figure 1

A

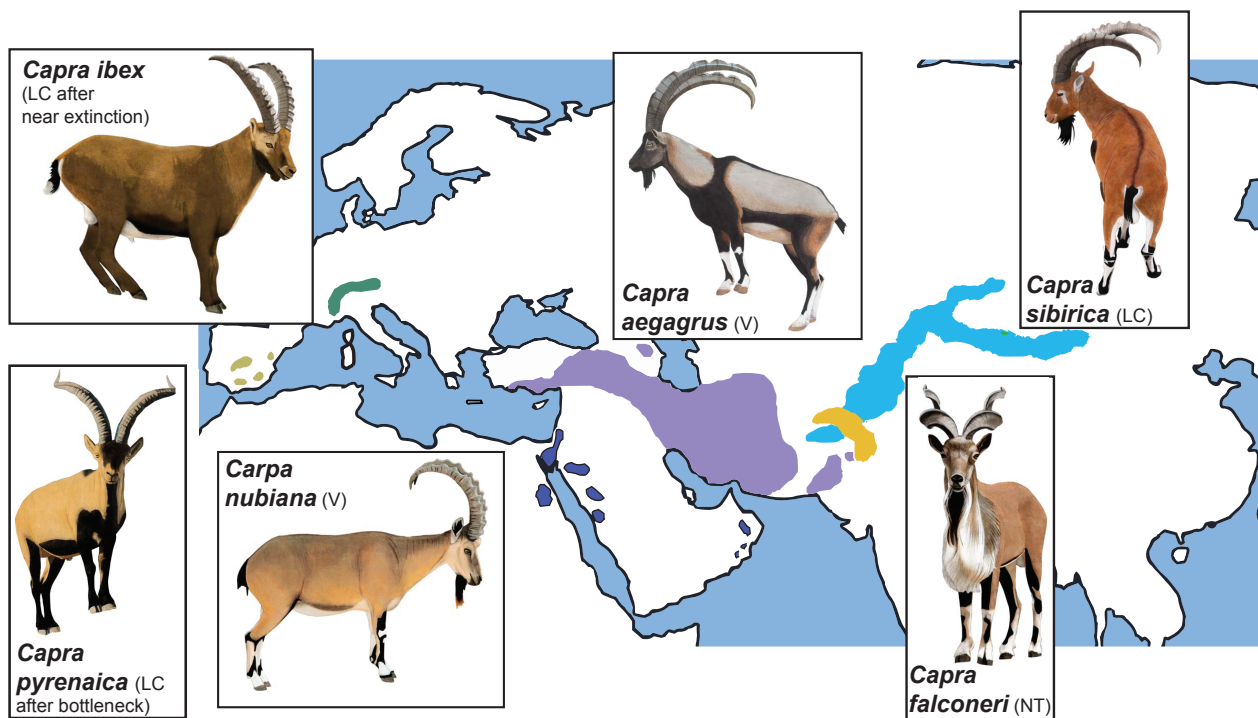

B

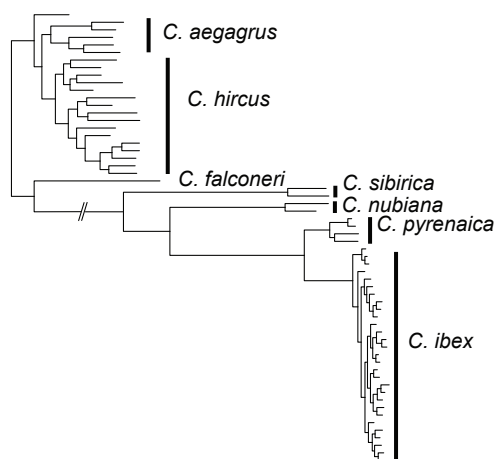

C

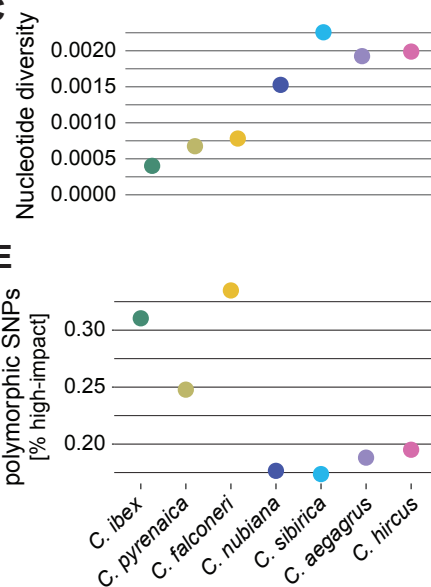

E

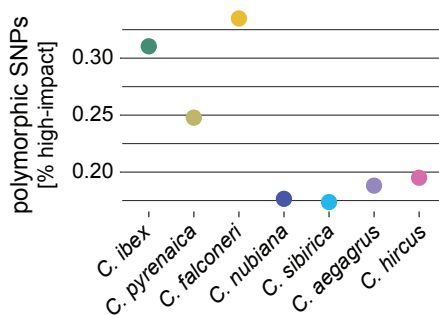

D

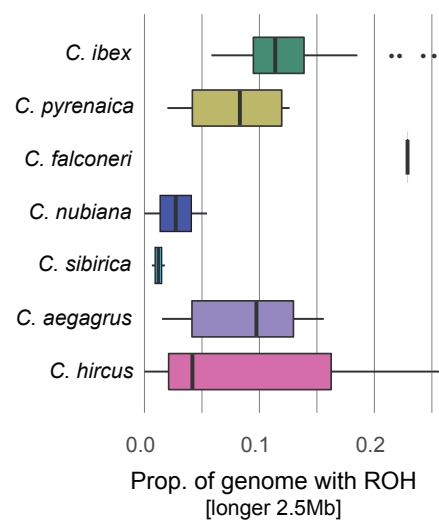



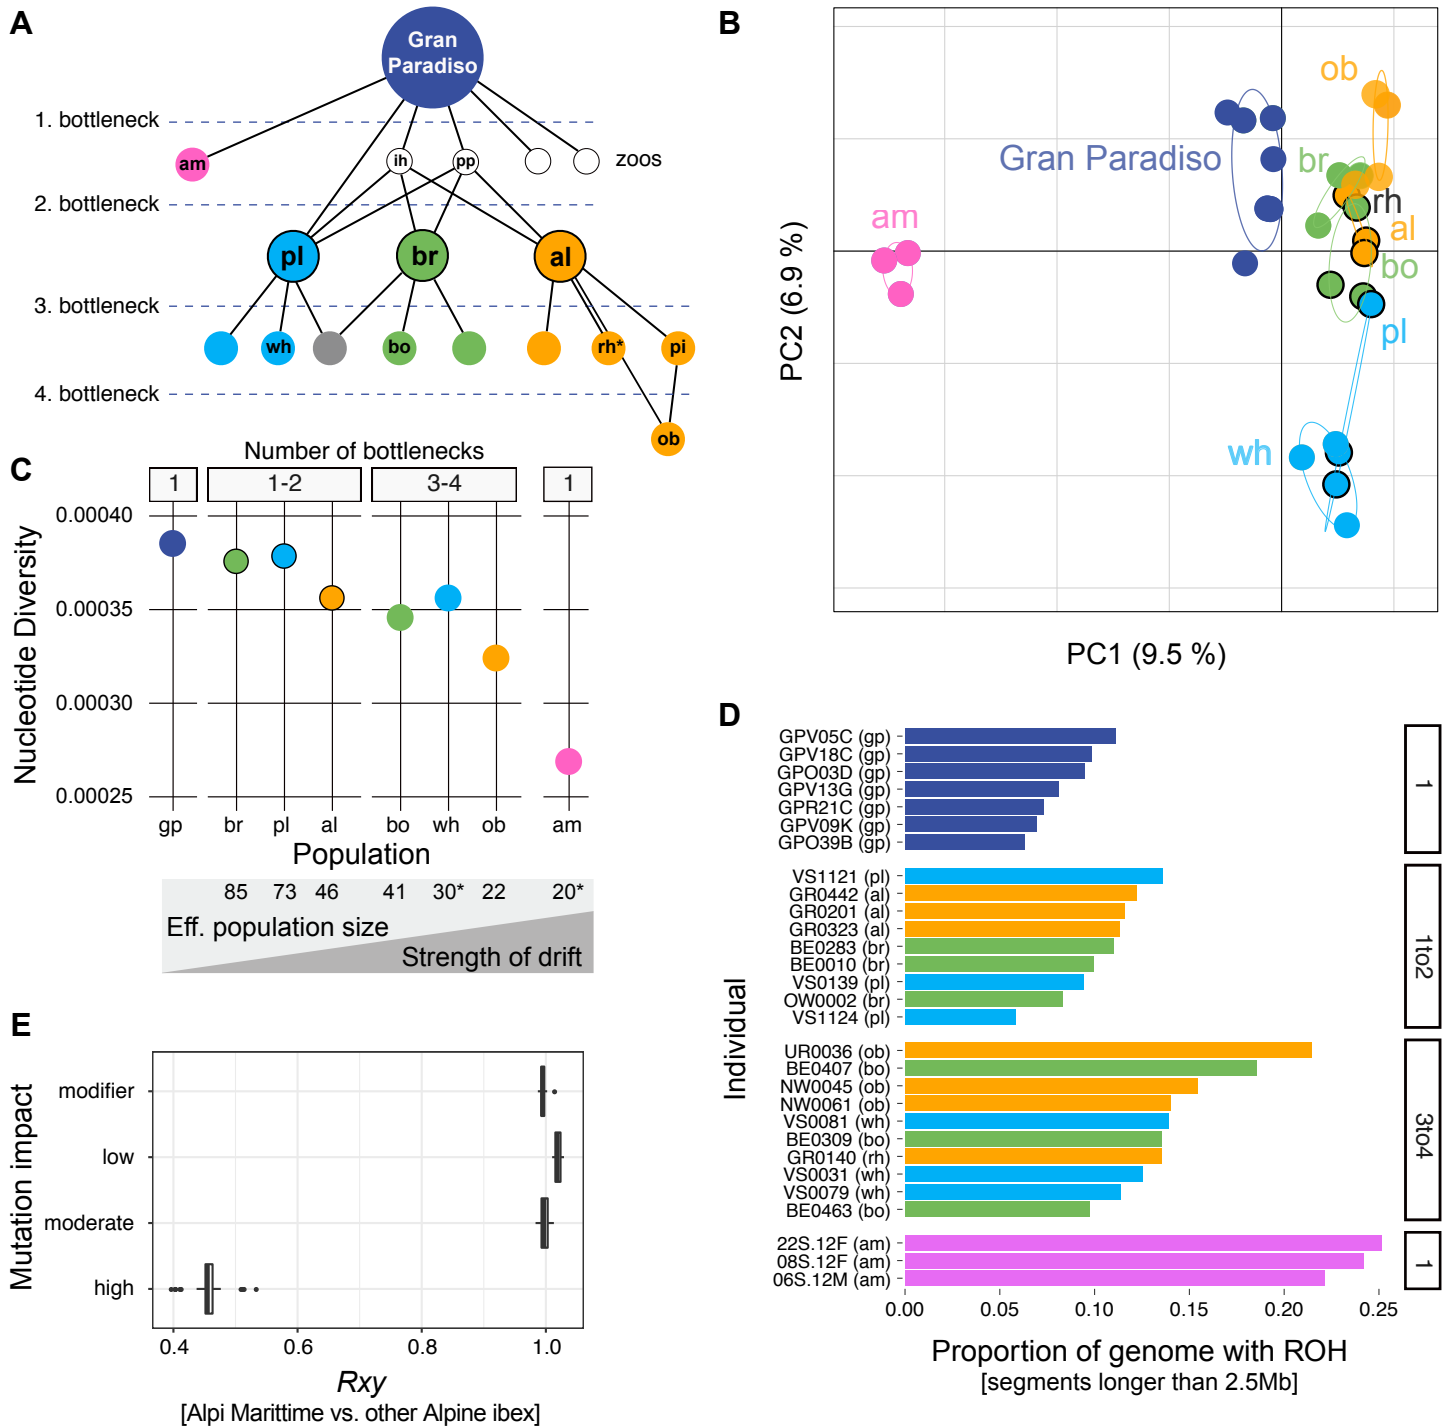

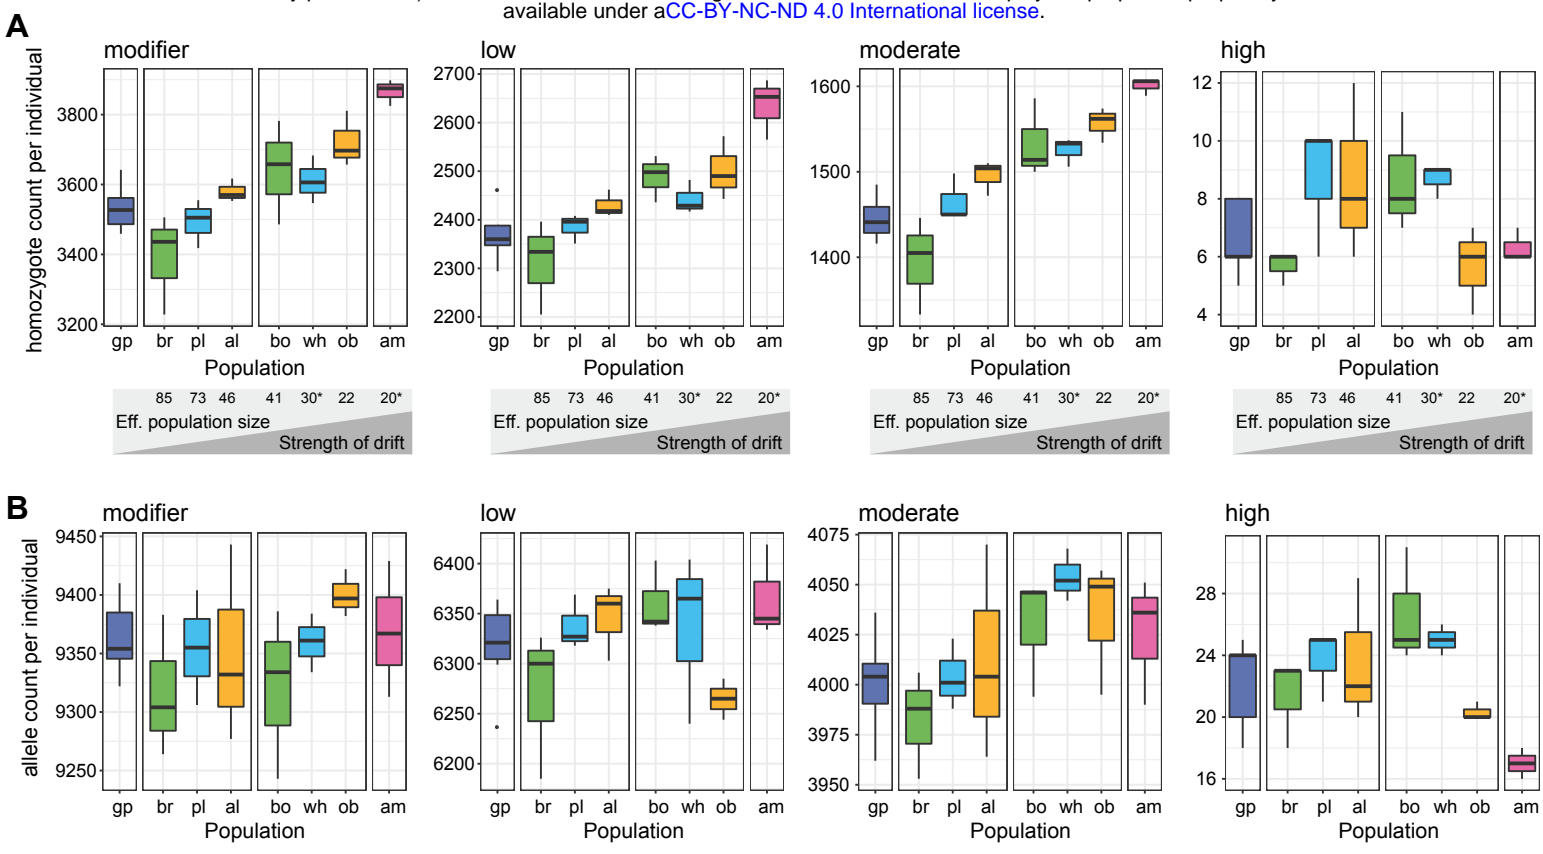

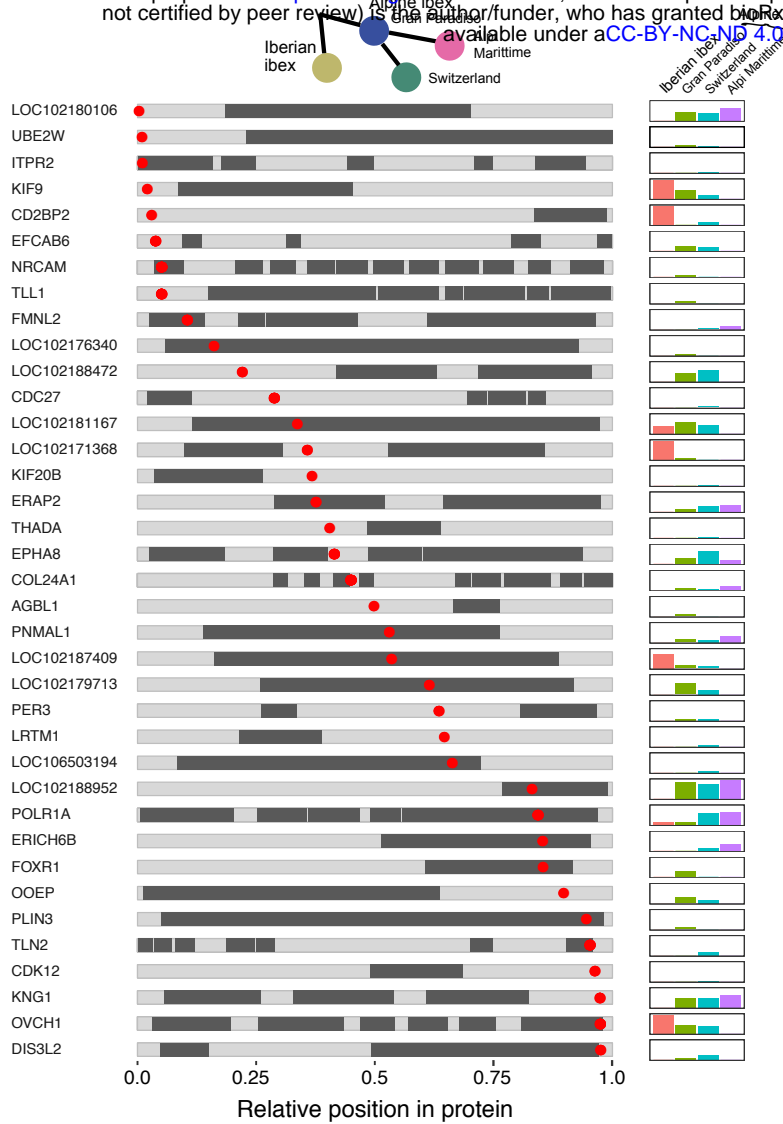

**A**

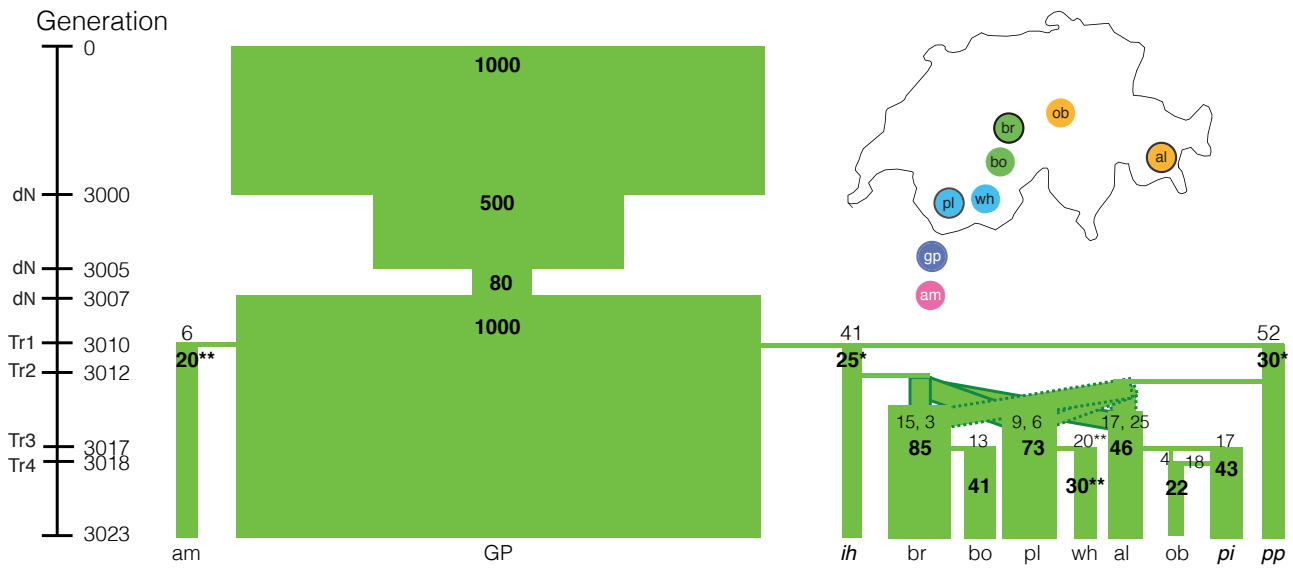

**B**

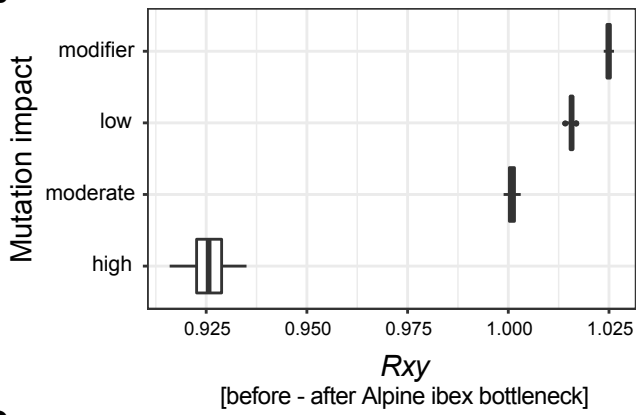

**D**

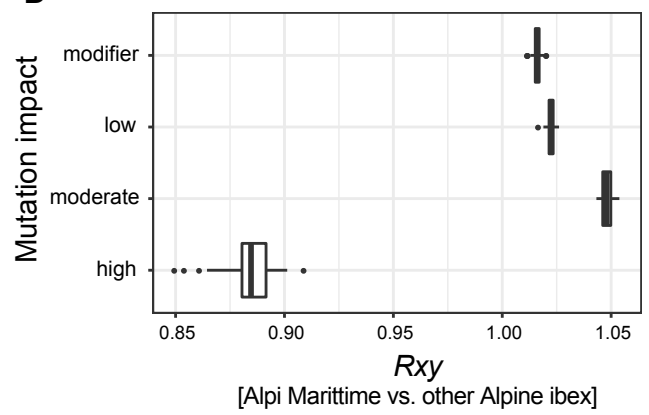

**C**

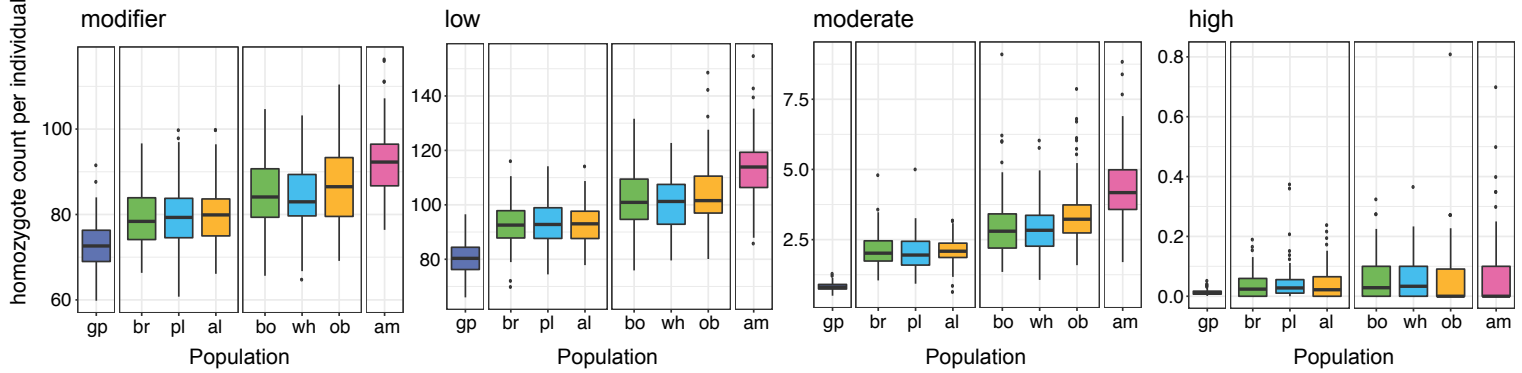

Source: http://biorxiv.org/content/10.1101/605147v1.full.pdf
